# Supplementary material for: Targeted Offline Two-Dimensional HPLC and UHPLC-Orbitrap-MS Combined with Molecular Networking Reveal the Effect of Processing on Chemical Constituents of Xuetong (the Stem of Kadsura heteroclita)
Source: MDPI journal article supplement (doi:10.3390/separations11030087), 2024-03-18
Supplement: s1 [file s1]

## ***Supplementary Data***

**Targeted offline two-dimensional HPLC and UHPLC-Orbitrap-MS  
combined with molecular networking reveal the effect of processing  
on chemical constituents of Xuetong (the stem of *Kadsura heteroclita*)**

Hanwen Yuan, Wei Su, Ling Liang, Qignling Xie, Mengying Lyu, Huanghe Yu, Bin Li,  
Wei Wang\*

TCM and Ethnomedicine Innovation & Development International Laboratory,  
Innovative Material Medical Research Institute, School of Pharmacy, Hunan University  
of Chinese Medicine, Changsha 410208, China

\* Corresponding author.

Email address: wangwei402@hotmail.com (W. Wang).

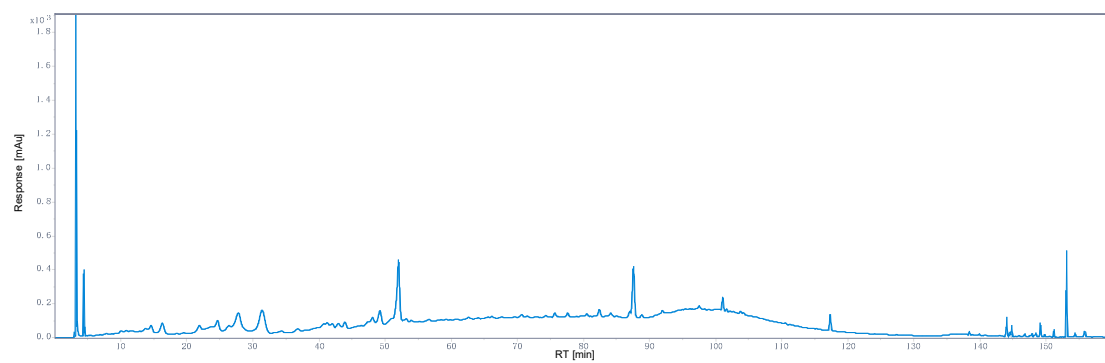

**Figure S1.** Optimized 1D HPLC chromatogram of Xueting.

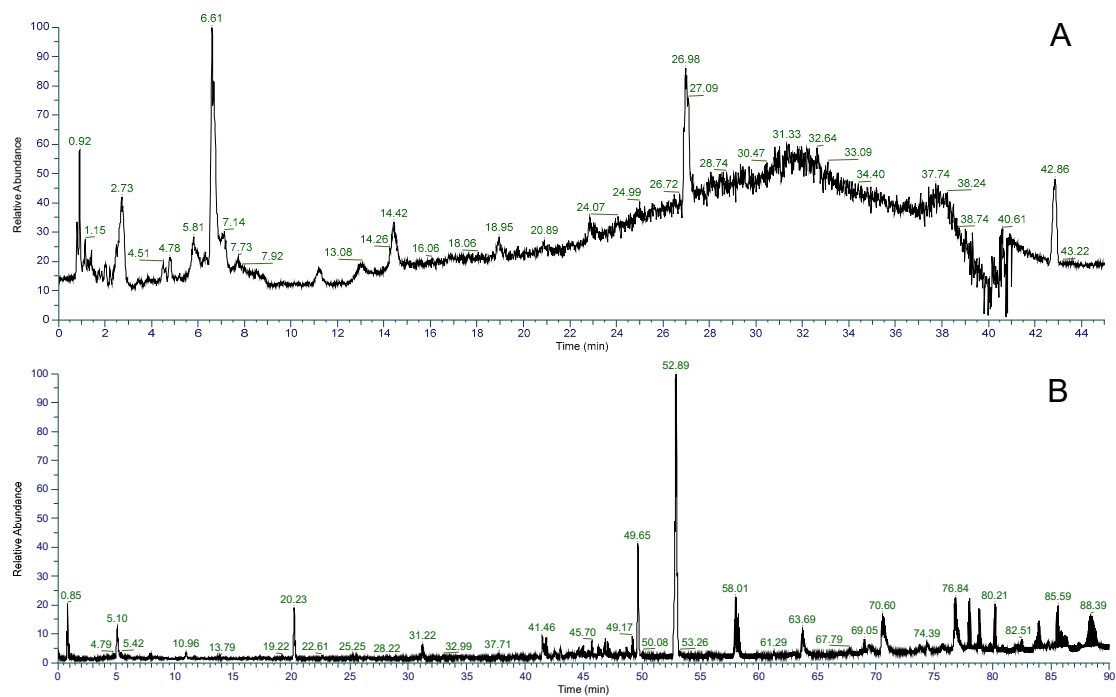

**Figure S2.** Total ion chromatogram (TIC) in the positive model of F1 (A) and F2 (B).

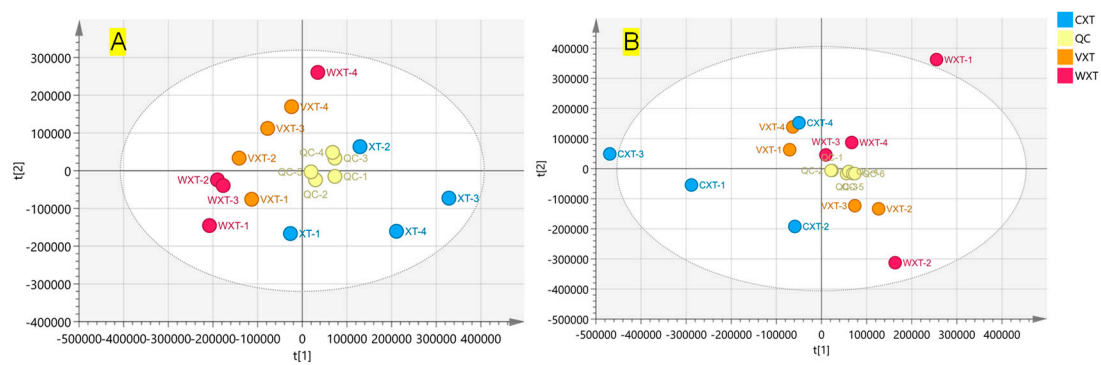

**Figure S3.** PCA scoring plot of <sup>2</sup>D LC-MS data of F1 (A) and F2 (B).

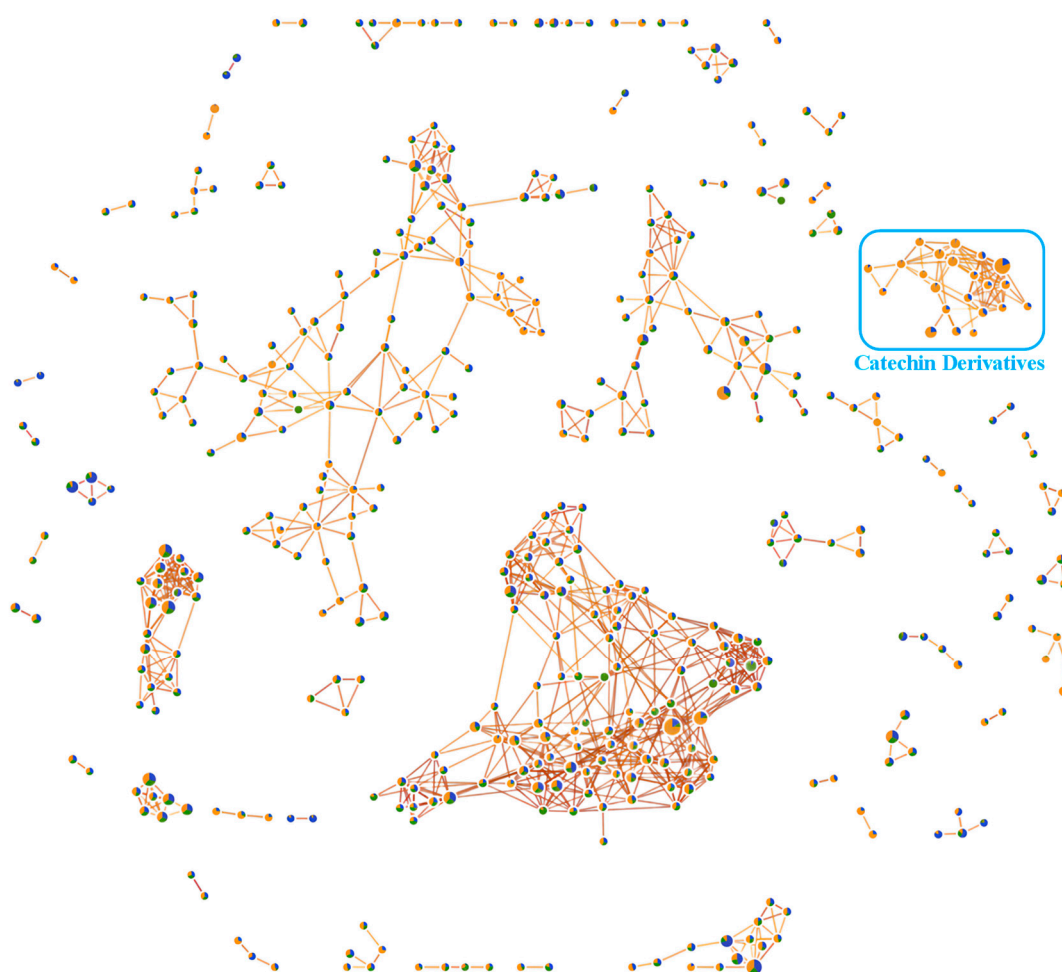

**Figure S4.** Molecular networking constructed by  $^2\text{D}$  UHPLC-MS data of F1.

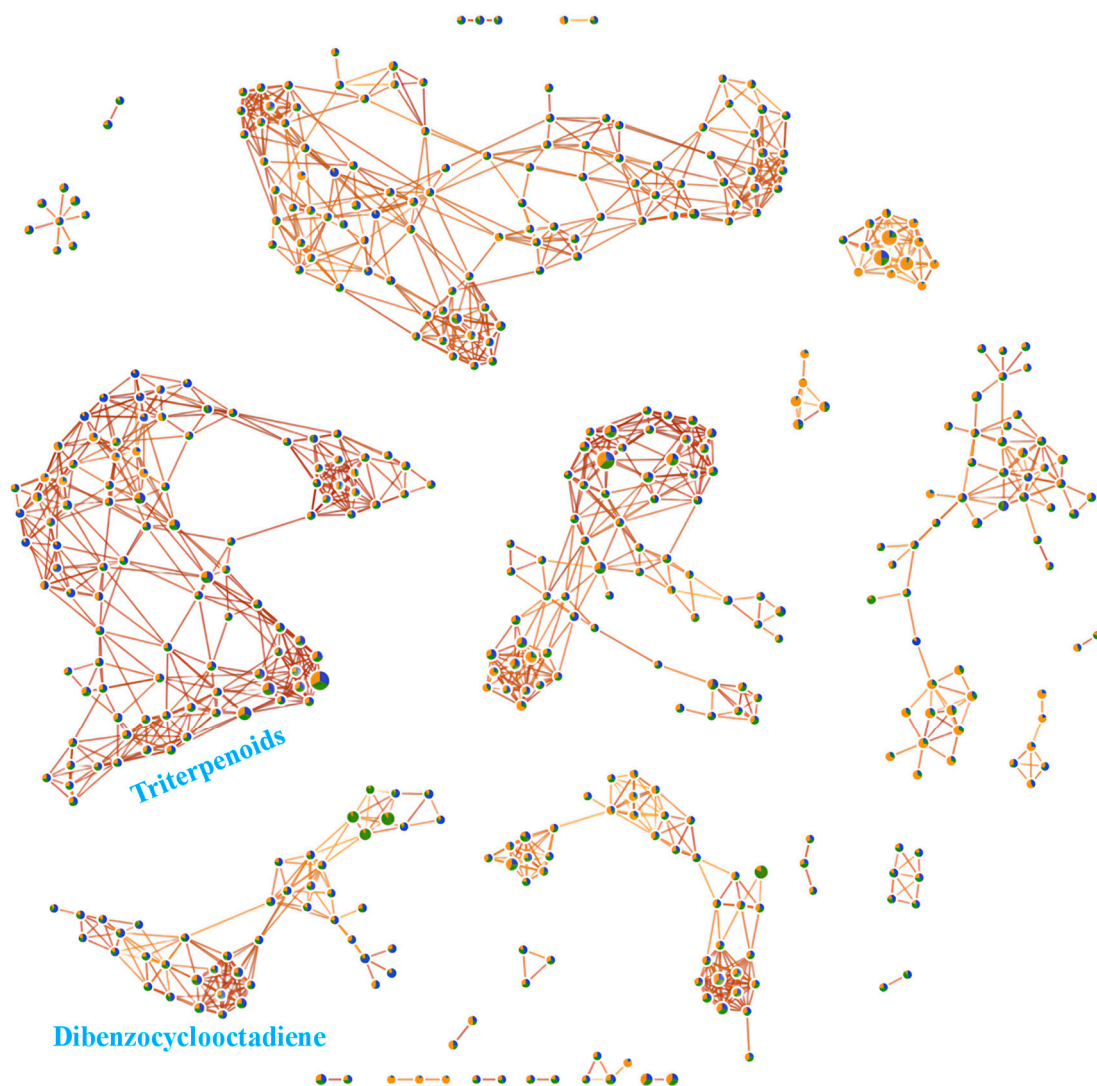

**Figure S5.** Molecular networking constructed by <sup>2</sup>D UHPLC-MS data of F2 in positive mode.

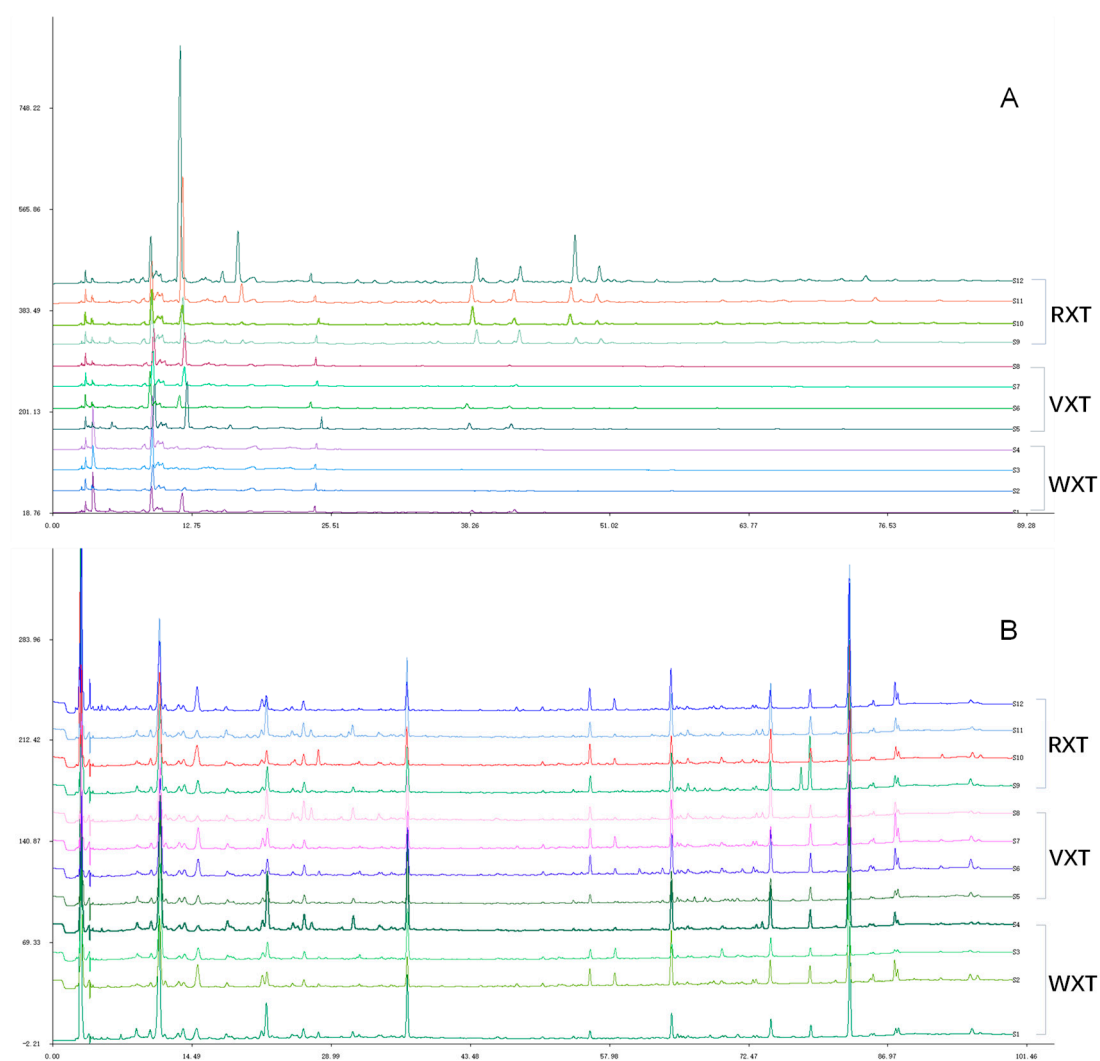

**Figure S6.** 2D HPLC Fingerprints of F1 (A) and F2 (B) of RXT (S9-S12), VXT (S5-S8), and WXT (S1-S4).

**Table S1.** Compounds identification of F1 by <sup>2</sup>D UHPLC-MS analysis.

| No. | RT<br>(min) | Compound                            | Molecular<br>formular                          | Adduct             | Experimental<br>m/z | Error<br>(ppm) | MS <sup>2</sup> fragment                                                                            | Identification | Class  |
|-----|-------------|-------------------------------------|------------------------------------------------|--------------------|---------------------|----------------|-----------------------------------------------------------------------------------------------------|----------------|--------|
| A1  | 0.847       | Methyl 4-hydroxycinnamate           | C <sub>10</sub> H <sub>10</sub> O <sub>3</sub> | [M-H] <sup>-</sup> | 177.05573           | 0.07           | 177.05565, 162.03217, 145.02946, 117.03455                                                          | mzVault        | Phenol |
| A2  | 0.893       | 4-Hydroxybenzaldehyde isomer        | C <sub>7</sub> H <sub>6</sub> O <sub>2</sub>   | [M-H] <sup>-</sup> | 121.02954           | 0.31           | 121.02952, 92.02673, 79.95729, 65.03951                                                             | mzCloud        | Phenol |
| A3  | 0.917       | 2,5-Dihydroxybenzaldehyde<br>isomer | C <sub>7</sub> H <sub>6</sub> O <sub>3</sub>   | [M-H] <sup>-</sup> | 137.02443           | 0.09           | 137.02434, 119.01384, 93.03458, 91.01890,<br>81.03451, 65.03977                                     | mzCloud        | Phenol |
| A4  | 1.028       | Salicylic acid isomer               | C <sub>7</sub> H <sub>6</sub> O <sub>3</sub>   | [M-H] <sup>-</sup> | 137.02442           | 0.02           | 111.04506, 96.02216, 93.03450, 83.05022,<br>73.02946, 55.01877                                      | mzCloud        | Phenol |
| A5  | 1.040       | 4-Hydroxybenzaldehyde isomer        | C <sub>7</sub> H <sub>6</sub> O <sub>2</sub>   | [M-H] <sup>-</sup> | 121.02954           | 0.31           | 121.02948, 94.02981, 93.02066, 79.95729                                                             | mzCloud        | Phenol |
| A6  | 1.140       | 6-Methoxysalicylic acid isomer      | C <sub>8</sub> H <sub>8</sub> O <sub>4</sub>   | [M-H] <sup>-</sup> | 167.03449           | -2.95          | 152.01147, 139.04007, 123.04507, 108.02158,<br>109.02958, 93.03444, 91.01878, 81.03443              | mzCloud        | Phenol |
| A7  | 1.245       | Ferulic acid                        | C <sub>10</sub> H <sub>10</sub> O <sub>4</sub> | [M-H] <sup>-</sup> | 193.05061           | -0.11          | 134.03731, 117.03454, 106.04237, 89.03948                                                           | mzCloud        | Phenol |
| A8  | 1.247       | Esculetin                           | C <sub>9</sub> H <sub>6</sub> O <sub>4</sub>   | [M-H] <sup>-</sup> | 177.01934           | 0.05           | 149.02451, 139.04018, 133.02953, 121.02973,<br>105.03458, 97.02988, 89.03970, 81.03442,<br>77.03954 | mzVault        | Phenol |
| A9  | 1.406       | 4-(Hydroxymethyl)benzoic acid       | C <sub>8</sub> H <sub>8</sub> O <sub>3</sub>   | [M-H] <sup>-</sup> | 151.04010           | 0.22           | 125.02448, 123.00883, 107.05023, 95.01379,<br>81.03458, 67.01893, 51.02399                          | mzCloud        | Phenol |
| A10 | 1.422       | Gentisic acid isomer                | C <sub>7</sub> H <sub>6</sub> O <sub>4</sub>   | [M-H] <sup>-</sup> | 153.01933           | -0.01          | 109.02953, 91.01882, 81.03457, 79.01902,<br>69.03467, 65.03975                                      | mzCloud        | Phenol |
| A11 | 1.430       | Catechol                            | C <sub>6</sub> H <sub>6</sub> O <sub>2</sub>   | [M-H] <sup>-</sup> | 109.02957           | 0.62           | 91.01910, 81.03469, 67.97457                                                                        | mzCloud        | Phenol |
| A12 | 1.531       | 2,5-Dihydroxybenzaldehyde<br>isomer | C <sub>7</sub> H <sub>6</sub> O <sub>3</sub>   | [M-H] <sup>-</sup> | 137.02442           | 0.02           | 137.02435, 109.02945, 93.03448, 81.03451,<br>65.03967                                               | mzCloud        | Phenol |
| A13 | 1.759       | L-(-)-3-Phenyllactic acid           | C <sub>9</sub> H <sub>10</sub> O <sub>3</sub>  | [M-H] <sup>-</sup> | 165.05574           | 0.14           | 147.04521, 119.05025, 101.03978, 91.05533,<br>72.99311                                              | mzCloud        | Phenol |



|             |       |                                                                                                                      |                                                 |                     |           |       |                                                                                                                                  |                       |          |
|-------------|-------|----------------------------------------------------------------------------------------------------------------------|-------------------------------------------------|---------------------|-----------|-------|----------------------------------------------------------------------------------------------------------------------------------|-----------------------|----------|
| <b>A14</b>  | 2.603 | Ethyl gallate                                                                                                        | C <sub>9</sub> H <sub>10</sub> O <sub>5</sub>   | [M-H] <sup>-</sup>  | 197.04555 | 0.02  | 203.08704, 197.04523, 137.02441, 125.02443, 111.04513, 95.05023, 83.01377, 71.01380, 59.01385, 57.03456                          | mzCloud               | Phenol   |
| <b>A15</b>  | 2.748 | Schizzandriside isomer                                                                                               | C <sub>25</sub> H <sub>32</sub> O <sub>10</sub> | [M-H] <sup>-</sup>  | 491.19176 | -1.04 | 359.14868, 313.10718, 241.05029, 203.08678, 159.04492, 147.04500, 109.02937, 89.02428, 71.01375, 59.01377                        | Fragmentation pattern | Lignan   |
| <b>A16</b>  | 2.939 | Gallic acid                                                                                                          | C <sub>7</sub> H <sub>6</sub> O <sub>5</sub>    | [M-H] <sup>-</sup>  | 169.01427 | 0.14  | 125.02435, 97.02922, 81.03447, 69.03459                                                                                          | mzCloud               | Phenol   |
| <b>A17</b>  | 2.983 | 2-(3,4-Dihydroxyphenyl)-2H-chromene-3,5,7-triol                                                                      | C <sub>15</sub> H <sub>12</sub> O <sub>6</sub>  | [M-H] <sup>-</sup>  | 287.05631 | 0.69  | 259.06125, 243.06552, 219.06581, 201.05524, 175.03979, 159.04478, 137.02437, 125.02446, 121.02939, 109.02957, 83.01384, 57.03453 | Network               | Catechin |
| <b>A18*</b> | 3.026 | Catechin                                                                                                             | C <sub>15</sub> H <sub>14</sub> O <sub>6</sub>  | [M-H] <sup>-</sup>  | 289.07167 | -0.32 | 245.08131, 221.08116, 205.05016, 159.04437, 151.03947, 149.02394, 125.02407, 123.04477, 109.02924, 97.02929, 83.01350, 57.03448  | Network, FISh         | Catechin |
| <b>A19</b>  | 4.788 | Salicylic acid isomer                                                                                                | C <sub>7</sub> H <sub>6</sub> O <sub>3</sub>    | [M-H] <sup>-</sup>  | 137.02443 | 0.09  | 108.02214, 93.03452, 68.01425, 65.99849                                                                                          | mzCloud               | Phenol   |
| <b>A20</b>  | 5.101 | Protocatechuic acid                                                                                                  | C <sub>7</sub> H <sub>6</sub> O <sub>4</sub>    | [M-H] <sup>-</sup>  | 153.01936 | 0.18  | 135.00888, 109.02959, 91.01911, 67.01893, 65.03970                                                                               | mzCloud               | Phenol   |
| <b>A21</b>  | 5.278 | Salicylic acid isomer                                                                                                | C <sub>7</sub> H <sub>6</sub> O <sub>3</sub>    | [M-H] <sup>-</sup>  | 137.02441 | -0.05 | 108.02139, 93.03461, 65.01446                                                                                                    | mzCloud               | Phenol   |
| <b>A22</b>  | 5.870 | 1- <i>O</i> -Vanilloyl- $\beta$ -D-glucose                                                                           | C <sub>14</sub> H <sub>18</sub> O <sub>9</sub>  | [M-H] <sup>-</sup>  | 329.08783 | 0.08  | 203.08685, 167.03494, 152.01146, 123.04514, 108.02159, 91.01911                                                                  | mzVault               | Phenol   |
| <b>A23</b>  | 5.872 | Vanillic acid                                                                                                        | C <sub>8</sub> H <sub>8</sub> O <sub>4</sub>    | [M-H] <sup>-</sup>  | 167.03493 | -0.31 | 152.01134, 123.04509, 108.02151                                                                                                  | mzVault               | Phenol   |
| <b>A24</b>  | 6.012 | 4-{(1R,2S)-1,3-Dihydroxy-2-[4-(3-hydroxypropyl)-2-methoxyphenoxy]propyl}-2-methoxyphenyl- $\beta$ -D-glucopyranoside | C <sub>26</sub> H <sub>36</sub> O <sub>12</sub> | [M+Na] <sup>+</sup> | 563.20964 | -0.46 | 468.09744, 401.15884, 353.13516, 203.05185, 137.05393, 107.04855, 91.05409                                                       | mzCloud               | Lignan   |

|             |        |                                                                             |                                                 |                     |           |       |                                                                                                                                              |               |          |
|-------------|--------|-----------------------------------------------------------------------------|-------------------------------------------------|---------------------|-----------|-------|----------------------------------------------------------------------------------------------------------------------------------------------|---------------|----------|
| <b>A25</b>  | 6.032  | Syringic acid                                                               | C <sub>9</sub> H <sub>10</sub> O <sub>5</sub>   | [M-H] <sup>-</sup>  | 197.04551 | -0.19 | 182.02194, 166.99855, 138.03210, 123.00871, 95.01365, 67.01908, 61.98830                                                                     | mzCloud       | Phenol   |
| <b>A26</b>  | 6.039  | 3,4,5-Trihydroxy-6-(hydroxymethyl)oxan-2-yl 3-hydroxy-4,5-dimethoxybenzoate | C <sub>15</sub> H <sub>20</sub> O <sub>10</sub> | [M+Na] <sup>+</sup> | 383.09491 | 0.11  | 221.04164, 202.05853, 185.04102, 124.01253                                                                                                   | mzCloud       | Phenol   |
| <b>A27</b>  | 6.941  | 3,4'-Dihydroxypropiofenone-3-β-D-glucoside                                  | C <sub>15</sub> H <sub>20</sub> O <sub>8</sub>  | [M-H] <sup>-</sup>  | 327.10957 | 3.15  | 203.08630, 147.04500, 101.02418, 89.02428, 71.01375, 59.01372                                                                                | mzCloud       | Phenol   |
| <b>A28*</b> | 7.930  | Gallocatechin                                                               | C <sub>15</sub> H <sub>14</sub> O <sub>7</sub>  | [M-H] <sup>-</sup>  | 305.06601 | -2.18 | 203.08698, 179.03506, 167.03516, 137.02415, 125.02447, 109.02922, 96.95994                                                                   | Network       | Catechin |
| <b>A29</b>  | 13.651 | Gentisic acid isomer                                                        | C <sub>7</sub> H <sub>6</sub> O <sub>4</sub>    | [M-H] <sup>-</sup>  | 153.01933 | -0.01 | 109.02940, 81.03468                                                                                                                          | mzCloud       | Phenol   |
| <b>A30</b>  | 18.878 | Procyanidin B1 isomer                                                       | C <sub>30</sub> H <sub>26</sub> O <sub>12</sub> | [M-H] <sup>-</sup>  | 577.13531 | 0.28  | 407.07584, 289.07230, 203.08670, 161.02477, 125.02428, 137.02422                                                                             | Network, FISH | Catechin |
| <b>A31</b>  | 19.658 | Rutin                                                                       | C <sub>27</sub> H <sub>30</sub> O <sub>16</sub> | [M-H] <sup>-</sup>  | 609.14628 | 0.28  | 300.02798, 271.02478, 255.02893, 243.02908, 227.03461,                                                                                       | mzCloud       | Phenol   |
| <b>A32</b>  | 19.830 | Catechin 3- <i>O</i> -β-D-glucopyranoside isomer                            | C <sub>21</sub> H <sub>24</sub> O <sub>11</sub> | [M-H] <sup>-</sup>  | 451.12402 | -1.25 | 289.17166, 245.08141, 203.08759, 151.04019, 123.04498, 109.02909, 97.02923, 57.03423                                                         | Network, FISH | Catechin |
| <b>A33</b>  | 19.830 | 2-(3,4-Dihydroxyphenyl)-2H-chromene-3,5,7-triol-β-D-glucopyranoside         | C <sub>21</sub> H <sub>22</sub> O <sub>11</sub> | [M-H] <sup>-</sup>  | 449.10827 | -1.48 | 287.05640, 259.06097, 243.06654, 229.05089, 203.03566, 201.05482, 177.02005, 175.04037, 165.01923, 149.02467, 121.02998, 109.02977, 83.01429 | Network       | Catechin |
| <b>A34</b>  | 20.457 | Catechin 3- <i>O</i> -β-D-glucopyranoside isomer                            | C <sub>21</sub> H <sub>24</sub> O <sub>11</sub> | [M-H] <sup>-</sup>  | 451.12392 | -1.47 | 289.07117, 245.08128, 203.08871, 179.03555, 137.02428, 123.04485, 109.02930, 97.02939, 57.03455                                              | Network, FISH | Catechin |

|             |        |                                                                                         |                                                 |                    |           |       |                                                                                                                                                                             |               |          |
|-------------|--------|-----------------------------------------------------------------------------------------|-------------------------------------------------|--------------------|-----------|-------|-----------------------------------------------------------------------------------------------------------------------------------------------------------------------------|---------------|----------|
| <b>A35</b>  | 21.638 | Procyanidin A2                                                                          | C <sub>30</sub> H <sub>24</sub> O <sub>12</sub> | [M-H] <sup>-</sup> | 575.11973 | 0.40  | 423.07172, 407.07715, 361.07065, 325.07159, 309.04086, 307.06161, 297.03979, 285.03851, 167.03508, 165.05579, 150.03265, 125.02442, 109.02969, 83.01373, 71.01386, 61.98850 | Network, FISh | Catechin |
| <b>A36*</b> | 21.656 | Procyanidol B4                                                                          | C <sub>30</sub> H <sub>26</sub> O <sub>12</sub> | [M-H] <sup>-</sup> | 577.13513 | -0.03 | 425.08759, 407.07602, 339.08646, 289.07159, 255.02930, 245.08206, 203.08826, 161.02443, 123.04505, 125.02433                                                                | Network, FISh | Catechin |
| <b>A37</b>  | 22.680 | Procyanidin B1 isomer                                                                   | C <sub>30</sub> H <sub>26</sub> O <sub>12</sub> | [M-H] <sup>-</sup> | 577.13541 | 0.45  | 407.07642, 289.07123, 203.08733, 166.05421, 161.02446, 125.02443, 123.04532                                                                                                 | Network, FISh | Catechin |
| <b>A38</b>  | 24.490 | Procyanidin                                                                             | C <sub>30</sub> H <sub>26</sub> O <sub>13</sub> | [M-H] <sup>-</sup> | 593.13030 | 0.40  | 407.07584, 339.08524, 289.07104, 255.03032, 177.01932, 125.02413, 109.02939, 93.03460                                                                                       | Network       | Catechin |
| <b>A39</b>  | 37.423 | 3-[2-(1,3-Benzodioxol-5-yl)-7-methoxy-1-benzofuran-5-yl]-3-hydroxypropyl hexopyranoside | C <sub>25</sub> H <sub>28</sub> O <sub>11</sub> | [M-H] <sup>-</sup> | 503.16120 | 10.56 | 221.06677, 203.08679, 179.05559, 161.04543, 143.03554, 119.03513, 113.02423, 89.02438, 71.01385, 59.01381                                                                   | mzCloud       | Phenol   |

---

\*Verified by the reference standards.

**Table S2.** Lignans in F2 identified by <sup>2</sup>D UHPLC-MS analysis.

| No.                    | RT<br>(min) | Compound                                                        | Molecular<br>formular                           | Adduct                | Calculated<br>m/z | Experimental<br>m/z | Error<br>(ppm) | MS <sup>2</sup> fragment                                                                                                       | Identification   |
|------------------------|-------------|-----------------------------------------------------------------|-------------------------------------------------|-----------------------|-------------------|---------------------|----------------|--------------------------------------------------------------------------------------------------------------------------------|------------------|
| <b>B1<sup>#</sup></b>  | 2.017       | Isolarisiresinol 9-O-(4"-O-rhamnosyl)-xylopyranoside            | C <sub>31</sub> H <sub>42</sub> O <sub>14</sub> | [M-H] <sup>-</sup>    | 637.25018         | 637.25170           | 2.39           | 513.17438, 491.19366, 359.14883, 325.10928, 311.09177, 297.90210, 203.08755, 201.07138, 112.98578                              | FISh             |
| <b>B2<sup>#</sup></b>  | 4.518       | Isolarisiresinol 9-O-(4"-O-xylopyranosyl)-xylopyranoside        | C <sub>30</sub> H <sub>40</sub> O <sub>14</sub> | [M-H] <sup>-</sup>    | 623.23453         | 623.23410           | -0.69          | 491.19397, 359.14917, 341.13861, 203.08670, 201.07129, 109.02927, 71.01406                                                     | Network,<br>FISh |
| <b>B3</b>              | 4.698       | Schizandriside isomer                                           | C <sub>25</sub> H <sub>32</sub> O <sub>10</sub> | [M-H] <sup>-</sup>    | 491.19227         | 491.19151           | -1.55          | 359.14883, 341.13797, 311.09225, 241.05109, 203.08752, 201.07120, 89.02441, 71.01388, 59.01380                                 | Network,<br>FISh |
| <b>B4<sup>*</sup></b>  | 5.101       | Schizandriside<br>(Isolarisiresinol 9-O-β-D-xylopyranoside)     | C <sub>25</sub> H <sub>32</sub> O <sub>10</sub> | [M-H] <sup>-</sup>    | 491.19227         | 491.19142           | -1.73          | 359.14941, 341.13928, 313.10901, 311.09369, 203.08755, 201.07181, 173.06128, 15904570, 109.03001, 89.02457, 71.01396, 59.01392 | Network,<br>FISh |
| <b>B5</b>              | 6.099       | Schizandriside isomer                                           | C <sub>25</sub> H <sub>32</sub> O <sub>10</sub> | [M-H] <sup>-</sup>    | 491.19227         | 491.19154           | -1.49          | 359.14923, 341.13818, 203.08734, 201.07153, 159.04575, 109.03043, 89.02482, 71.01411, 59.01386                                 | Network,<br>FISh |
| <b>B6</b>              | 8.342       | Secoisolariciresinol-9-O-β-D-xylopyranoside                     | C <sub>25</sub> H <sub>34</sub> O <sub>10</sub> | [M-H] <sup>-</sup>    | 493.20792         | 493.20720           | -1.46          | 361.16437, 343.15414, 313.14450, 203.08699, 201.07120, 161.06088, 121.02970, 59.01384                                          | Network          |
| <b>B7</b>              | 9.368       | Schizandriside isomer                                           | C <sub>25</sub> H <sub>32</sub> O <sub>10</sub> | [M-H] <sup>-</sup>    | 491.19227         | 491.19150           | -1.57          | 341.13934, 311.12875, 281.08286, 203.08734, 201.07124, 121.02978, 71.01399                                                     | Network          |
| <b>B8</b>              | 17.410      | Schizandriside isomer                                           | C <sub>25</sub> H <sub>32</sub> O <sub>10</sub> | [M-H] <sup>-</sup>    | 491.19227         | 491.19150           | -1.57          | 359.14923, 201.07161, 121.02980, 71.01411                                                                                      | Network,<br>FISh |
| <b>B9<sup>#</sup></b>  | 13.647      | 8-Hydroxyoxomatairesinol-β-D-glucopyranoside                    | C <sub>26</sub> H <sub>30</sub> O <sub>13</sub> | [M-H] <sup>-</sup>    | 549.16136         | 549.16100           | -0.66          | 387.10751, 369.09760, 343.11719, 203.08696, 201.07124, 121.02967, 83.01395                                                     | Network,<br>FISh |
| <b>B10<sup>#</sup></b> | 17.236      | 6-Hydroxyhinokinin-6-O-(4"-O-xylopyranosyl)-β-D-glucopyranoside | C <sub>31</sub> H <sub>36</sub> O <sub>16</sub> | [M+HCOO] <sup>-</sup> | 709.19854         | 709.19819           | -0.49          | 369.09717, 325.10892, 297.11258, 203.08678, 201.07196, 121.02959, 83.01393                                                     | Network,<br>FISh |

|                        |        |                                                                                                  |                                                 |                       |           |           |       |                                                                                       |               |
|------------------------|--------|--------------------------------------------------------------------------------------------------|-------------------------------------------------|-----------------------|-----------|-----------|-------|---------------------------------------------------------------------------------------|---------------|
| <b>B11<sup>#</sup></b> | 17.466 | 6-Hydroxyhinokinin-6- <i>O</i> -(4"- <i>O</i> -rhamnosyl)- $\beta$ -D-glucopyranoside            | C <sub>32</sub> H <sub>38</sub> O <sub>16</sub> | [M+HCOO] <sup>-</sup> | 723.21419 | 723.21402 | -0.23 | 369.09753, 325.10886, 297.11261, 203.08679, 201.07166, 161.06067, 121.02974, 83.01382 | Network, FISH |
| <b>B12<sup>#</sup></b> | 17.541 | 6-Hydroxyhinokinin-6- <i>O</i> -(4"- <i>O</i> -xylopyranosyl)- $\beta$ -D-glucopyranoside isomer | C <sub>31</sub> H <sub>36</sub> O <sub>16</sub> | [M+HCOO] <sup>-</sup> | 709.19854 | 709.19846 | -0.11 | 369.09668, 325.10849, 203.08716, 201.07149, 121.03005, 107.05068, 83.01434            | FISH          |
| <b>B13<sup>#</sup></b> | 18.746 | 6-Hydroxyhinokinin-6- <i>O</i> -(4"- <i>O</i> -rhamnosyl)- $\beta$ -D-glucopyranoside isomer     | C <sub>32</sub> H <sub>38</sub> O <sub>16</sub> | [M+HCOO] <sup>-</sup> | 723.21419 | 723.21414 | -0.06 | 369.09775, 325.10883, 203.08732, 201.07095, 121.02969, 112.98572                      | FISH          |
| <b>B14<sup>#</sup></b> | 18.902 | 6-Hydroxyhinokinin-6- <i>O</i> -(4"- <i>O</i> -xylopyranosyl)- $\beta$ -D-glucopyranoside isomer | C <sub>32</sub> H <sub>38</sub> O <sub>16</sub> | [M-H] <sup>-</sup>    | 663.19306 | 663.19298 | -0.12 | 369.09796, 325.10696, 203.08701, 201.07106, 121.02971, 83.01402                       | FISH          |
| <b>B15</b>             | 19.206 | 6-Hydroxyhinokinin-6- <i>O</i> - $\beta$ -D-glucopyranoside isomer                               | C <sub>26</sub> H <sub>28</sub> O <sub>12</sub> | [M+HCOO] <sup>-</sup> | 577.15628 | 577.15786 | 2.741 | 369.09631, 325.10941, 203.08705, 201.07144, 201.05038, 121.03004, 82.93755, 79.96176  | FISH          |
| <b>B16</b>             | 20.020 | 6-Hydroxyhinokinin-6- <i>O</i> - $\beta$ -D-glucopyranoside isomer                               | C <sub>26</sub> H <sub>28</sub> O <sub>12</sub> | [M+HCOO] <sup>-</sup> | 577.15628 | 577.15630 | 0.038 | 369.09641, 325.1913, 203.08659, 201.07159, 121.02929, 83.01390                        | FISH          |
| <b>B17<sup>*</sup></b> | 20.230 | 6-Hydroxyhinokinin-6- <i>O</i> - $\beta$ -D-glucopyranoside                                      | C <sub>26</sub> H <sub>28</sub> O <sub>12</sub> | [M+HCOO] <sup>-</sup> | 577.15628 | 577.15594 | -0.59 | 369.09729, 325.10919, 203.08707, 201.07124, 121.02929, 102.94852, 83.01415            | FISH          |
| <b>B18</b>             | 20.391 | 6-Hydroxyhinokinin-6- <i>O</i> - $\beta$ -D-glucopyranoside isomer                               | C <sub>26</sub> H <sub>28</sub> O <sub>12</sub> | [M+HCOO] <sup>-</sup> | 577.15628 | 577.15610 | -0.31 | 369.09619, 325.10788, 203.08705, 201.07150, 121.02946, 83.01378                       | FISH          |

|                        |        |                                                                    |                                                 |                       |           |           |       |                                                                                                                                                                                                                                                                                            |                   |
|------------------------|--------|--------------------------------------------------------------------|-------------------------------------------------|-----------------------|-----------|-----------|-------|--------------------------------------------------------------------------------------------------------------------------------------------------------------------------------------------------------------------------------------------------------------------------------------------|-------------------|
| <b>B19</b>             | 21.690 | 6-Hydroxyhinokinin-6- <i>O</i> - $\beta$ -D-glucopyranoside isomer | C <sub>26</sub> H <sub>28</sub> O <sub>12</sub> | [M+HCOO] <sup>-</sup> | 577.15628 | 577.15625 | -0.05 | 369.09802, 325.10593, 203.08701, 201.07144                                                                                                                                                                                                                                                 | FISh              |
| <b>B20<sup>#</sup></b> | 23.931 | 6-Hydroxyhinokinin-6- <i>O</i> -xylopyranoside                     | C <sub>25</sub> H <sub>26</sub> O <sub>11</sub> | [M+HCOO] <sup>-</sup> | 547.14571 | 547.14548 | -0.43 | 369.09683, 325.10901, 297.11273, 201.07121, 121.02987, 102.94897, 83.03649, 61.98861                                                                                                                                                                                                       | FISh              |
| <b>B21<sup>*</sup></b> | 31.203 | 6-Hydroxyhinokinin                                                 | C <sub>20</sub> H <sub>18</sub> O <sub>7</sub>  | [M-H] <sup>-</sup>    | 369.09798 | 369.09669 | -3.48 | 325.10901, 297.11218, 203.08704, 210.07178, 175.07655, 135.04507, 121.02951, 107.05031, 121.02951, 83.01385                                                                                                                                                                                | Network, FISh     |
| <b>B22</b>             | 32.014 | 6-Hydroxyhinokinin isomer                                          | C <sub>20</sub> H <sub>18</sub> O <sub>7</sub>  | [M-H] <sup>-</sup>    | 369.09798 | 369.09682 | -3.13 | 325.10825, 297.11148, 150.03204, 121.02922, 107.05048, 83.01407                                                                                                                                                                                                                            | FISh              |
| <b>B23</b>             | 32.867 | 6-Hydroxyhinokinin isomer                                          | C <sub>20</sub> H <sub>18</sub> O <sub>7</sub>  | [M-H] <sup>-</sup>    | 369.09798 | 369.09689 | -2.94 | 325.10767, 297.11118, 203.08760, 201.07083, 121.02984, 83.01392                                                                                                                                                                                                                            | Network           |
| <b>B24</b>             | 35.958 | Kadsuranin isomer                                                  | C <sub>30</sub> H <sub>36</sub> O <sub>11</sub> | [M+Na] <sup>+</sup>   | 595.21498 | 595.21510 | 0.198 | 495.16284, 435.14282, 413.16025, 385.16501, 371.14883, 356.12485, 340.13058, 329.10776, 325.10776, 309.11310, 295.09689, 265.06646, 251.07033, 237.05473, 235.07753, 211.07497, 207.08000, 195.08055, 178.07729, 165.07006                                                                 | In-house database |
| <b>B25</b>             | 36.919 | Heteroclitalignan A                                                | C <sub>31</sub> H <sub>32</sub> O <sub>11</sub> | [M+Na] <sup>+</sup>   | 603.18368 | 603.18368 | -0    | 543.16278, 523.31787, 481.14838, 439.13953, 421.12592, 399.14529, 391.11737, 357.13309, 355.11682, 327.12442, 311.09079, 295.09695, 281.07953, 267.06573, 251.06917, 237.05522, 223.07587, 209.05940, 195.07875, 181.06511, 167.08568, 165.06993, 141.06984, 105.03340, 95.04820, 91.11907 | In-house database |
| <b>B26</b>             | 37.897 | Heteroclitalignan A isomer                                         | C <sub>31</sub> H <sub>32</sub> O <sub>11</sub> | [M+H] <sup>+</sup>    | 581.20174 | 581.19937 | -4.07 | 521.17908, 421.12628, 399.14212, 355.11795, 325.10736, 295.09613, 265.08633, 237.05487, 221.05995, 203.08492, 181.06520, 165.07037, 153.07050                                                                                                                                              | Network           |

|            |        |                       |                                                 |                     |           |           |       |                                                                                                                                                                                                                  |                   |
|------------|--------|-----------------------|-------------------------------------------------|---------------------|-----------|-----------|-------|------------------------------------------------------------------------------------------------------------------------------------------------------------------------------------------------------------------|-------------------|
| <b>B27</b> | 38.328 | Kadheterin C          | C <sub>32</sub> H <sub>38</sub> O <sub>11</sub> | [M+Na] <sup>+</sup> | 621.23063 | 621.23042 | -0.34 | 435.14227, 413.16199, 371.14893, 356.12540, 340.13068, 329.10205, 325.10739, 309.11633, 295.09641, 281.08008, 265.08668, 251.07018, 239.07088, 223.07661, 207.07967, 195.08189, 181.06421                        | In-house database |
| <b>B28</b> | 38.770 | Heilaohuguosu B       | C <sub>28</sub> H <sub>34</sub> O <sub>10</sub> | [M+Na] <sup>+</sup> | 553.20442 | 553.20450 | 0.149 | 453.15149, 421.12650, 413.15985, 385.16528, 371.14877, 356.12552, 342.10904, 329.10214, 313.10657, 298.08383, 271.06104, 255.06587, 241.08595, 235.07523, 327.06929, 209.05911, 197.06021, 181.06396, 167.08559, | Network           |
| <b>B29</b> | 38.929 | Heteroclitin Q        | C <sub>31</sub> H <sub>32</sub> O <sub>11</sub> | [M+Na] <sup>+</sup> | 603.18368 | 603.18366 | -0.04 | 481.14700, 421.12558, 357.13303, 355.11826, 342.10941, 325.10742, 295.09628, 299.09143, 265.08597, 251.06961, 237.05447, 195.08058, 181.06482, 165.07036, 105.03342, 69.97251                                    | Network           |
| <b>B30</b> | 39.361 | Heteroclitin Q isomer | C <sub>31</sub> H <sub>32</sub> O <sub>11</sub> | [M+Na] <sup>+</sup> | 603.18368 | 603.18376 | 0.129 | 481.14346, 421.12567, 399.14465, 355.11771, 325.10727, 315.08665, 295.09692, 265.08569, 251.07043, 235.07466, 225.05510, 205.06493, 181.06531, 165.07007, 153.07028, 95.04886                                    | In-house database |
| <b>B31</b> | 41.595 | kadsurarin            | C <sub>30</sub> H <sub>36</sub> O <sub>11</sub> | [M+Na] <sup>+</sup> | 595.21498 | 595.21489 | -0.15 | 435.14108, 413.16095, 371.14859, 356.12433, 340.13080, 325.10736, 295.09747, 267.10196, 265.08646, 251.07066, 223.07506, 207.08054, 181.06485, 167.08620, 83.04925                                               | Network           |
| <b>B32</b> | 42.469 | Heteroclitalignan D   | C <sub>32</sub> H <sub>34</sub> O <sub>11</sub> | [M+Na] <sup>+</sup> | 617.19933 | 617.19904 | -0.47 | 435.14136, 413.16327, 382.14075, 371.14883, 369.13336, 356.12469, 340.13058, 329.10208, 325.10770, 309.11264, 295.09824, 265.08344, 251.07098, 239.07076, 235.07573, 223.07620, 209.05983, 181.06543, 165.06992  | Network           |

|            |        |                              |                                                 |                     |           |           |       |                                                                                                                                                                                           |         |
|------------|--------|------------------------------|-------------------------------------------------|---------------------|-----------|-----------|-------|-------------------------------------------------------------------------------------------------------------------------------------------------------------------------------------------|---------|
| <b>B33</b> | 43.070 | Kadsuphilol P                | C <sub>31</sub> H <sub>32</sub> O <sub>10</sub> | [M+Na] <sup>+</sup> | 587.18877 | 587.18877 | 0.004 | 527.17328, 163.18716, 405.13052, 383.14841, 343.11743, 311.09103, 293.11780, 225.09149, 165.05473, 105.03346, 95.04912, 77.03860                                                          | Network |
| <b>B34</b> | 43.861 | Heteroclitalignan B          | C <sub>31</sub> H <sub>38</sub> O <sub>11</sub> | [M+Na] <sup>+</sup> | 609.23063 | 609.23038 | -0.41 | 435.14313, 413.16049, 371.14914, 369.13358, 356.12570, 340.13062, 329.10306, 325.10718, 309.11365, 295.09814, 267.10220, 251.07112, 235.07468, 223.07675, 211.07484, 197.06105, 181.06497 | Network |
| <b>B35</b> | 43.862 | Angustifolin A               | C <sub>36</sub> H <sub>32</sub> O <sub>10</sub> | [M+H] <sup>+</sup>  | 625.20682 | 625.20420 | -4.19 | 371.14880, 356.12656, 341.13928, 325.10880, 311.09406, 309.11301, 299.09155, 293.08084, 279.06561, 251.07156, 227.06944                                                                   | Network |
| <b>B36</b> | 44.056 | Kadsuphilol R                | C <sub>32</sub> H <sub>38</sub> O <sub>11</sub> | [M+Na] <sup>+</sup> | 621.23063 | 621.23029 | -0.55 | 521.17639, 421.12579, 357.13391, 355.11880, 342.10873, 325.10764, 295.09616, 281.08093, 265.08594, 252.07791, 237.05470, 209.06021, 181.06511, 165.07004, 153.07071                       | Network |
| <b>B37</b> | 44.277 | Kadheterin F                 | C <sub>36</sub> H <sub>34</sub> O <sub>11</sub> | [M+H] <sup>+</sup>  | 643.21739 | 643.21473 | -4.13 | 435.14297, 413.16165, 371.14908, 356.12564, 340.13098, 325.10721, 309.11310, 295.09711, 265.08618, 251.07082, 235.07410, 223.07515, 205.06516, 181.06558, 165.07045, 153.06989            | Network |
| <b>B38</b> | 45.866 | Kadangustin C                | C <sub>34</sub> H <sub>38</sub> O <sub>11</sub> | [M+H] <sup>+</sup>  | 623.24869 | 623.24602 | -4.28 | 435.14227, 413.16199, 371.14893, 356.12540, 340.13068, 329.10205, 325.10739, 309.11633, 295.09641, 281.08008, 265.08688, 251.07018., 223.07616, 197.06071, 181.06421, 165.07036, 83.04895 | Network |
| <b>B39</b> | 46.020 | Ananonin B (Arisanschinin D) | C <sub>32</sub> H <sub>34</sub> O <sub>10</sub> | [M+Na] <sup>+</sup> | 601.20442 | 601.20442 | 0.00  | 397.16541, 357.13339, 326.11493, 311.09146, 281.08136, 225.09006, 105.03345                                                                                                               | Network |



|            |        |                               |                                                 |                     |           |           |       |                                                                                                                                                                                                                                                             |         |
|------------|--------|-------------------------------|-------------------------------------------------|---------------------|-----------|-----------|-------|-------------------------------------------------------------------------------------------------------------------------------------------------------------------------------------------------------------------------------------------------------------|---------|
| <b>B40</b> | 46.119 | 9-Benzoyloxy-gomisin B        | C <sub>35</sub> H <sub>38</sub> O <sub>11</sub> | [M+H] <sup>+</sup>  | 635.24869 | 635.24601 | -4.21 | 435.14120, 413.15955, 383.14618, 371.14896, 369.13327, 356.12506, 340.13074, 329.10233, 325.10739, 311.09018, 309.11322, 295.09708, 265.08658, 251.07109, 235.07503, 223.07457, 195.08087, 181.06485, 165.07045, 153.07028                                  | Network |
| <b>B41</b> | 46.276 | Interiotherin C               | C <sub>30</sub> H <sub>36</sub> O <sub>10</sub> | [M+Na] <sup>+</sup> | 579.22007 | 579.22008 | 0.022 | 397.16391, 367.15207, 357.13312, 342.10986, 326.11481, 311.09106, 299.09149, 283.09666, 281.08102, 241.04991, 225.05473, 210.06723, 195.08096, 165.06935, 137.50542, 85.30091                                                                               | Network |
| <b>B42</b> | 46.622 | 9-Benzoyloxy-gomisin B isomer | C <sub>35</sub> H <sub>38</sub> O <sub>11</sub> | [M+Na] <sup>+</sup> | 657.23063 | 657.23038 | -0.38 | 435.14090, 413.16022, 371.14899, 369.13318, 356.12506, 340.13107, 329.10278, 325.10657, 307.09482, 295.09723, 281.08145, 267.10172, 251.07008, 235.07458, 223.07550, 207.08125, 195.08102, 181.06493, 165.06963, 155.08669                                  | Network |
| <b>B43</b> | 47.438 | Schizanrin A                  | C <sub>31</sub> H <sub>32</sub> O <sub>8</sub>  | [M+Na] <sup>+</sup> | 555.19894 | 555.19881 | -0.23 | 473.25070, 448.07404, 385.16486, 376.12778, 353.13867, 343.11850, 323.12946, 316.09375, 295.13382, 285.07733, 277.08624, 265.08676, 249.09061, 241.05029, 225.05508, 211.07555, 205.06596, 197.05928, 169.06465, 165.07063, 155.04936, 141.06975, 137.05367 | Network |
| <b>B44</b> | 47.547 | Intermedin A                  | C <sub>35</sub> H <sub>40</sub> O <sub>11</sub> | [M+H] <sup>+</sup>  | 637.26434 | 637.26162 | -4.26 | 435.14087, 413.16049, 371.14868, 356.12579, 340.13056, 329.10202, 325.10748, 309.11307, 295.09711, 277.08527, 251.07051, 235.07556, 223.07622, 211.07573, 205.06494, 181.06526, 167.08578                                                                   | Network |
| <b>B45</b> | 48.123 | Tiegusanin I                  | C <sub>31</sub> H <sub>38</sub> O <sub>10</sub> | [M+Na] <sup>+</sup> | 593.23572 | 593.23582 | 0.173 | 403.13559, 397.13528, 371.14560, 367.15427, 366.14716, 357.13321, 326.11478, 327.12497, 311.09171, 299.09183, 283.09668, 281.08130, 253.08626, 225.09131, 195.08032, 165.07060                                                                              | Network |

|            |        |                                                   |                                                 |                     |           |           |       |                                                                                                                                                                                                                                                 |                   |
|------------|--------|---------------------------------------------------|-------------------------------------------------|---------------------|-----------|-----------|-------|-------------------------------------------------------------------------------------------------------------------------------------------------------------------------------------------------------------------------------------------------|-------------------|
| <b>B46</b> | 49.166 | Kadsutherin                                       | C <sub>27</sub> H <sub>32</sub> O <sub>7</sub>  | [M+H] <sup>+</sup>  | 469.22208 | 469.22198 | -0.21 | 439.16458, 355.15393, 353.13953, 343.11862, 339.11932, 329.10486, 323.12927, 316.09296, 311.09116, 302.07889, 295.13376, 281.08099, 263.10718, 242.05716, 197.05928, 181.06578, 165.07108, 57.06989                                             | Network           |
| <b>B47</b> | 49.167 | Wuweizisu C                                       | C <sub>22</sub> H <sub>24</sub> O <sub>6</sub>  | [M+H] <sup>+</sup>  | 385.16456 | 385.16449 | -0.19 | 370.14236, 355.15408, 343.11633, 339.12241, 329.10272, 323.12824, 316.09384, 311.09042, 302.07803, 297.07559, 295.13342, 285.07629, 265.08554, 255.06467, 241.04951, 225.05473, 203.08502, 183.04431, 155.04915, 139.05423, 115.05396, 87.99991 | Network           |
| <b>B48</b> | 49.445 | Longipedunin C                                    | C <sub>31</sub> H <sub>32</sub> O <sub>8</sub>  | [M+Na] <sup>+</sup> | 555.19894 | 555.19880 | -0.25 | 407.14511, 392.12369, 376.13040, 355.15469, 316.09244, 271.05771, 229.14876, 208.35350, 76.04242                                                                                                                                                | In-house database |
| <b>B49</b> | 8.125  | Apigenin 5- <i>O</i> - $\beta$ -D-glucopyranoside | C <sub>21</sub> H <sub>20</sub> O <sub>10</sub> | [M+H] <sup>+</sup>  | 433.11292 | 433.11312 | 0.46  | 271.06058, 203.08655, 201.07161, 151.00345, 119.05008, 107.01387, 59.01387                                                                                                                                                                      | Standard          |

\*Verified by the reference standard.

#Potential new compound.

**Table S3.** Triterpenoids in F2 identified by <sup>2</sup>D UHPLC-MS analysis.

| No. | RT<br>(min) | Compound                       | Molecular<br>formular                          | Adduct             | Calculated<br>m/z | Experimental<br>m/z | Error<br>(ppm) | MS <sup>2</sup> fragment                                                                                                                                                                                                                     | Identification    |
|-----|-------------|--------------------------------|------------------------------------------------|--------------------|-------------------|---------------------|----------------|----------------------------------------------------------------------------------------------------------------------------------------------------------------------------------------------------------------------------------------------|-------------------|
| C1  | 37.735      | Diosgenin                      | C <sub>27</sub> H <sub>44</sub> O <sub>5</sub> | [M+H] <sup>+</sup> | 415.32067         | 415.32064           | -0.07          | 397.31039, 275.20145, 261.18533, 249.18600, 235.16922, 207.13870, 203.17947, 195.13800, 189.16403, 159.11723, 147.11670, 135.11687, 119.08570, 107.08548, 95.08562, 67.05434, 55.05431                                                       | mzCloud           |
| C2  | 39.136      | Heteroclitalactone<br>E isomer | C <sub>32</sub> H <sub>40</sub> O <sub>7</sub> | [M+H] <sup>+</sup> | 537.28468         | 537.28458           | -0.18          | 477.26184, 267.13898, 261.12683, 233.09544, 225.09183, 217.10025, 207.08101, 179.08626, 165.06972, 97.02840                                                                                                                                  | In-house database |
| C3  | 39.877      | Heteroclitalactone<br>E isomer | C <sub>32</sub> H <sub>40</sub> O <sub>7</sub> | [M+H] <sup>+</sup> | 537.28468         | 537.28464           | -0.07          | 477.26279, 303.17593, 267.13785, 261.12747, 233.09590, 221.13203, 207.11639, 193.10149, 179.08548, 165.06903, 109.06470, 81.06976                                                                                                            | In-house database |
| C4  | 40.866      | Kadsulactone A                 | C <sub>30</sub> H <sub>42</sub> O <sub>5</sub> | [M+H] <sup>+</sup> | 483.3105          | 483.31043           | -0.14          | 465.29987, 447.28708, 325.21619, 307.20685, 299.20013, 269.15256, 247.16949, 229.06891, 209.13181, 197.13159, 195.11746, 183.11713, 169.10118, 157.10150, 145.10123, 131.08543, 119.08556, 105.06982, 91.05408, 81.06988, 67.05412, 55.05420 | In-house database |
| C5* | 41.465      | Heteroclitalactone<br>E        | C <sub>32</sub> H <sub>40</sub> O <sub>7</sub> | [M+H] <sup>+</sup> | 537.28468         | 537.28461           | -0.13          | 477.26328, 323.20352, 321.18585, 267.13904, 229.12352, 221.13287, 207.11754, 165.07094, 109.06471, 81.06989                                                                                                                                  | In-house database |
| C6  | 41.473      | Kadsuracoccinic<br>acids B     | C <sub>30</sub> H <sub>48</sub> O <sub>2</sub> | [M+H] <sup>+</sup> | 441.37271         | 441.37266           | -0.10          | 441.36206, 423.36731, 269.23068, 215.18015, 203.17941, 189.16377, 175.14806, 159.11676, 147.11678, 133.10100, 119.08540, 107.08540, 95.08543, 81.06976, 67.05424, 55.05415                                                                   | In-house database |

|            |        |                             |                                                |                                     |           |           |       |                                                                                                                                                                                                                                              |                          |
|------------|--------|-----------------------------|------------------------------------------------|-------------------------------------|-----------|-----------|-------|----------------------------------------------------------------------------------------------------------------------------------------------------------------------------------------------------------------------------------------------|--------------------------|
| <b>C7</b>  | 41.562 | Schisandronic acid isomer   | C <sub>30</sub> H <sub>46</sub> O <sub>3</sub> | [M-H <sub>2</sub> O+H] <sup>+</sup> | 437.34141 | 437.34132 | -0.20 | 394.29638, 381.28064, 325.21640, 295.24265, 269.22470, 253.19135, 227.18002, 211.14838, 183.11707, 171.11696, 157.10103, 133.10120, 109.10085, 95.08527, 81.06981, 67.05422, 55.05418                                                        | In-house database        |
| <b>C8</b>  | 41.737 | Kadsuphilactone B           | C <sub>30</sub> H <sub>42</sub> O <sub>5</sub> | [M+Na] <sup>+</sup>                 | 505.29244 | 505.29240 | -0.09 | 483.31702, 465.30322, 447.28894, 429.28149, 325.21423, 307.20721, 257.15317, 245.15498, 231.13722, 215.14392, 197.13275, 183.11734, 171.11656, 157.10138, 145.10144, 131.08571, 119.08553, 105.06984, 95.08540, 81.06995, 67.05414, 55.05429 | In-house database, Clogp |
| <b>C9</b>  | 42.492 | Heteroclitalactone E isomer | C <sub>32</sub> H <sub>40</sub> O <sub>7</sub> | [M+H] <sup>+</sup>                  | 537.28468 | 537.28461 | -0.13 | 477.27325, 321.18469, 277.19513, 221.13269, 207.11688, 221.13269, 205.10124, 193.10095, 179.08415, 109.06488, 83.04926                                                                                                                       | In-house database        |
| <b>C10</b> | 42.595 | seco-Coccinic acids A       | C <sub>30</sub> H <sub>48</sub> O <sub>2</sub> | [M+H] <sup>+</sup>                  | 441.37271 | 441.37264 | -0.15 | 441.37262, 423.36334, 327.26626, 269.22668, 215.17896, 211.14900, 199.14838, 183.11728, 171.11687, 157.10138, 145.101174, 131.08533, 119.08550, 109.10120, 95.08552, 81.06985, 69.06994, 67.05421, 55.05426                                  | In-house database        |
| <b>C11</b> | 43.035 | Schisanlactone B            | C <sub>30</sub> H <sub>42</sub> O <sub>4</sub> | [M+H] <sup>+</sup>                  | 467.31558 | 467.31544 | -0.31 | 449.30402, 431.29419, 407.25052, 368.26950, 327.23160, 309.22192, 273.18607, 197.13293, 183.11653, 171.11649, 159.11684, 157.10091, 145.10086, 131.08559, 119.08542, 105.06973, 95.08540, 91.05412, 83.04903                                 | In-house database        |
| <b>C12</b> | 43.101 | seco-Coccinic acids B       | C <sub>30</sub> H <sub>48</sub> O <sub>2</sub> | [M+H] <sup>+</sup>                  | 441.37271 | 441.37267 | -0.08 | 423.36331, 217.19568, 203.17903, 189.16351, 175.14810, 159.11694, 147.11661, 135.11662, 133.10121, 119.08546, 107.08549, 95.08553, 81.06981, 69.06986, 55.05436                                                                              | In-house database        |

|             |        |                           |                                                |                                     |           |           |       |                                                                                                                                                                                                                                          |                          |
|-------------|--------|---------------------------|------------------------------------------------|-------------------------------------|-----------|-----------|-------|------------------------------------------------------------------------------------------------------------------------------------------------------------------------------------------------------------------------------------------|--------------------------|
| <b>C13</b>  | 44.163 | Lancilactone B isomer     | C <sub>30</sub> H <sub>38</sub> O <sub>4</sub> | [M+H] <sup>+</sup>                  | 463.28428 | 463.28429 | 0.01  | 445.27213, 427.26266, 417.28210, 323.20120, 269.15332, 223.14847, 209.13257, 193.10144, 179.08534, 169.10094, 157.10155, 131.08630, 119.08526, 95.08555, 91.05418, 81.06976                                                              | In-house database        |
| <b>C14</b>  | 44.459 | Coccinetane A             | C <sub>30</sub> H <sub>48</sub> O <sub>2</sub> | [M+H] <sup>+</sup>                  | 441.37271 | 441.37270 | -0.01 | 441.37482, 423.36234, 241.19426, 215.18053, 203.17979, 189.16393, 161.13222, 147.11679, 135.11694, 119.08545, 107.08557, 95.08560, 81.06996, 67.05426, 55.05423                                                                          | In-house database        |
| <b>C15</b>  | 44.518 | Schisanlactone A          | C <sub>30</sub> H <sub>40</sub> O <sub>4</sub> | [M+H] <sup>+</sup>                  | 465.29993 | 465.29982 | -0.25 | 447.29056, 429.27847, 419.29562, 401.28531, 381.27994, 333.22250, 325.21671, 307.20456, 227.14340, 209.13347, 197.13298, 185.13275, 171.11765, 157.10120, 143.08582, 131.08545, 119.08559, 105.06988, 95.08562, 67.05425                 | In-house database        |
| <b>C16*</b> | 44.519 | Heteroclitalactone G      | C <sub>32</sub> H <sub>40</sub> O <sub>6</sub> | [M+H] <sup>+</sup>                  | 521.28976 | 521.28973 | -0.07 | 461.26819, 347.19397, 321.18286, 293.15329, 267.13950, 261.12772, 247.11252, 233.09689, 207.11732, 193.10144, 191.08554, 179.08574, 165.07040, 95.08575, 67.05442                                                                        | In-house database        |
| <b>C17</b>  | 44.823 | Schisandronic acid isomer | C <sub>30</sub> H <sub>46</sub> O <sub>3</sub> | [M-H <sub>2</sub> O+H] <sup>+</sup> | 437.34141 | 437.34140 | -0.01 | 269.22723, 239.18098, 213.16458, 211.1448, 199.14888, 183.11719, 173.13269, 169.10101, 159.11731, 145.10132, 133.10132, 131.06525, 119.08547, 109.10099, 105.06967, 95.08561, 93.06961, 91.05417, 81.06977, 69.06992, 67.05430, 55.05419 | In-house database        |
| <b>C18</b>  | 45.494 | Kadnanolactone A          | C <sub>32</sub> H <sub>44</sub> O <sub>4</sub> | [M+H] <sup>+</sup>                  | 469.33123 | 469.33118 | -0.12 | 451.32639, 433.31030, 329.24698, 311.23950, 249.18552, 233.15399, 217.15897, 185.13261, 173.13138, 159.11646, 145.10133, 119.08548, 105.06979, 95.08548, 81.06988, 67.05428, 55.05422                                                    | In-house database        |
| <b>C19</b>  | 45.976 | Kadcotrione A             | C <sub>30</sub> H <sub>44</sub> O <sub>5</sub> | [M+H] <sup>+</sup>                  | 485.32615 | 485.32610 | -0.10 | 449.30045, 311.23740, 235.13596, 229.07407, 199.14845, 175.11281, 159.11755, 137.05989, 133.10135, 119.08554, 107.08523, 93.06986, 81.06969, 67.05437, 55.05432                                                                          | In-house database, Clogp |

|             |        |                           |                                                |                                     |           |           |       |                                                                                                                                                                                                                                                                               |                   |
|-------------|--------|---------------------------|------------------------------------------------|-------------------------------------|-----------|-----------|-------|-------------------------------------------------------------------------------------------------------------------------------------------------------------------------------------------------------------------------------------------------------------------------------|-------------------|
| <b>C20</b>  | 46.211 | Schisanlactone B isomer   | C <sub>30</sub> H <sub>42</sub> O <sub>4</sub> | [M+H] <sup>+</sup>                  | 467.31558 | 467.31550 | -0.18 | 449.30588, 431.29688, 421.29688, 413.28360, 407.29871, 389.24454, 327.23178, 309.22208, 299.20044, 287.19958, 273.18378, 211.14885, 197.13286, 185.13272, 183.11650, 171.11676, 157.10118, 145.10114, 131.08542, 119.08526, 105.06982, 95.06990, 81.06985, 67.05439, 55.05422 | In-house database |
| <b>C21</b>  | 46.368 | Kadsuphilactone B isomer  | C <sub>30</sub> H <sub>42</sub> O <sub>5</sub> | [M+Na] <sup>+</sup>                 | 505.29244 | 505.29243 | -0.03 | 447.28934, 429.27396, 419.29697, 311.23849, 309.22107, 283.24258, 231.24258, 229.15724, 215.14310, 197.13297, 185.13234, 157.10091, 145.10161, 143.08566, 131.08546, 119.08533, 105.06958, 95.08550, 81.05424, 67.05421, 55.05429                                             | In-house database |
| <b>C22</b>  | 46.471 | Schisanlactone B isomer   | C <sub>30</sub> H <sub>42</sub> O <sub>4</sub> | [M+H] <sup>+</sup>                  | 467.31558 | 467.31549 | -0.20 | 449.30801, 431.29312, 407.29550, 353.24878, 327.23138, 309.22226, 223.14877, 199.14816, 183.11635, 171.11650, 157.10098, 145.10081, 131.08534, 119.08530, 105.06989, 95.08549, 81.06978                                                                                       | In-house database |
| <b>C23</b>  | 46.769 | Schisandronic acid isomer | C <sub>30</sub> H <sub>46</sub> O <sub>3</sub> | [M-H <sub>2</sub> O+H] <sup>+</sup> | 437.34141 | 437.34129 | -0.26 | 394.28851, 369.36444, 355.25239, 325.21658, 285.18307, 271.16971, 239.17999, 227.18004, 211.14804, 185.13203, 171.11678, 157.10097, 145.10112, 133.10106, 119.08545, 109.10098, 95.08543, 81.06981, 69.06987, 55.05420                                                        | In-house database |
| <b>C24</b>  | 46.808 | Lancilactone B            | C <sub>30</sub> H <sub>38</sub> O <sub>4</sub> | [M+H] <sup>+</sup>                  | 463.28428 | 463.28419 | -0.20 | 445.27322, 427.26498, 409.25333, 399.27155, 364.23996, 349.21796, 331.20584, 323.20111, 295.17053, 277.15897, 221.13222, 207.11702, 193.10178, 157.10097, 95.08553, 91.05454,                                                                                                 | In-house database |
| <b>C25*</b> | 46.835 | <i>d</i> -Epigalbacin     | C <sub>20</sub> H <sub>20</sub> O <sub>5</sub> | [M+H] <sup>+</sup>                  | 341.13835 | 341.13830 | -0.14 | 219.10105, 201.09157, 163.07549, 135.04401, 105.06976, 79.05428, 65.03859                                                                                                                                                                                                     | In-house database |

|            |        |                         |                                                |                    |           |           |       |                                                                                                                                                                                                                                              |                          |
|------------|--------|-------------------------|------------------------------------------------|--------------------|-----------|-----------|-------|----------------------------------------------------------------------------------------------------------------------------------------------------------------------------------------------------------------------------------------------|--------------------------|
| <b>C26</b> | 47.229 | Schisanlactone B isomer | C <sub>30</sub> H <sub>42</sub> O <sub>4</sub> | [M+H] <sup>+</sup> | 467.31558 | 467.31549 | -0.20 | 449.30872, 431.29419, 413.29184, 407.29669, 397.20062, 327.23218, 309.22189, 285.11752, 271.17004, 213.16377, 211.14890, 183.11752, 171.11671, 157.10136, 145.10101, 119.08546, 105.06995, 95.06995, 67.05412                                | In-house database        |
| <b>C27</b> | 47.566 | Lancilactone B isomer   | C <sub>30</sub> H <sub>38</sub> O <sub>4</sub> | [M+H] <sup>+</sup> | 463.28428 | 463.28427 | -0.03 | 445.27374, 427.26208, 417.27960, 403.26300, 323.20135, 305.19040, 269.15298, 249.12679, 223.14888, 209.13246, 179.08557, 143.08551, 119.08560, 105.06967, 93.06980, 91.05408                                                                 | In-house database        |
| <b>C28</b> | 47.737 | Kadcotrione C           | C <sub>30</sub> H <sub>44</sub> O <sub>5</sub> | [M+H] <sup>+</sup> | 485.32615 | 485.32611 | -0.08 | 467.31012, 449.30713, 432.30148, 329.24609, 311.23666, 293.33617, 277.38632, 235.16841, 217.16022, 203.14317, 189.16362, 175.11179, 159.11649, 147.11652, 133.10117, 119.08547, 107.08539, 93.06992, 81.06982, 67.05414, 55.05428            | In-house database, Clogp |
| <b>C29</b> | 48.098 | Schisanlactone B isomer | C <sub>30</sub> H <sub>42</sub> O <sub>4</sub> | [M+H] <sup>+</sup> | 467.31558 | 467.31540 | -0.40 | 449.30386, 431.29663, 421.30890, 413.28549, 335.23602, 327.23041, 309.22247, 291.21341, 281.22766, 229.15894, 215.14157, 187.14819, 173.13276, 159.11687, 145.10097, 131.08575, 119.08552, 105.06970, 95.08546, 81.06998, 67.05432, 55.05437 | In-house database        |
| <b>C30</b> | 48.277 | Schisanlactone B isomer | C <sub>30</sub> H <sub>42</sub> O <sub>4</sub> | [M+H] <sup>+</sup> | 467.31558 | 467.31550 | -0.18 | 449.30472, 431.29684, 421.31100, 327.23398, 245.15417, 135.14607, 233.15520, 213.12813, 197.13268, 183.11661, 171.11652, 157.10158, 145.10129, 131.08517, 105.06973, 95.08550, 81.06989, 67.05418, 55.05426                                  | In-house database        |
| <b>C31</b> | 49.447 | Manwuweizic acid        | C <sub>30</sub> H <sub>46</sub> O <sub>4</sub> | [M+H] <sup>+</sup> | 471.34688 | 471.34683 | -0.12 | 229.06781, 201.16411, 181.12141, 161.13277, 147.11681, 133.10120, 121.10120, 105.06962, 95.08548, 81.06995, 67.05417, 55.05428                                                                                                               | In-house database, Clogp |

|             |        |                         |                                                |                         |           |           |       |                                                                                                                                                                                                                                                                                                     |                   |
|-------------|--------|-------------------------|------------------------------------------------|-------------------------|-----------|-----------|-------|-----------------------------------------------------------------------------------------------------------------------------------------------------------------------------------------------------------------------------------------------------------------------------------------------------|-------------------|
| <b>C32*</b> | 49.651 | Heteroclitalactone A    | C <sub>32</sub> H <sub>46</sub> O <sub>6</sub> | [M-AcOH+H] <sup>+</sup> | 467.31558 | 467.31544 | -0.31 | 449.30508, 431.29385, 327.23016, 309.00072, 225.16359, 197.13284, 185.13219, 159.11713, 157.10107, 119.08538, 105.06979, 95.08540, 67.05432                                                                                                                                                         | In-house database |
| <b>C33</b>  | 50.119 | Lancilactone B isomer   | C <sub>30</sub> H <sub>38</sub> O <sub>4</sub> | [M+H] <sup>+</sup>      | 463.28428 | 463.28430 | 0.03  | 445.27322, 427.26520, 417.27701, 403.26666, 323.20020, 305.18976, 269.15347, 251.14258, 223.14835, 207.11697, 179.08575, 157.10097, 131.08549, 119.08556, 105.06985, 95.08544, 91.05421, 79.05409, 67.05425                                                                                         | In-house database |
| <b>C34</b>  | 50.281 | Kadsudilactone          | C <sub>32</sub> H <sub>44</sub> O <sub>4</sub> | [M+H] <sup>+</sup>      | 469.33123 | 469.33115 | -0.18 | 451.32159, 433.31146, 415.30280, 329.25015, 311.23874, 249.18491, 231.17496, 215.14276, 201.12810, 187.14821, 173.13268, 159.11687, 145.10130, 133.10120, 119.08540, 105.06979, 95.08556, 81.06995, 67.05421, 55.05418                                                                              | In-house database |
| <b>C35</b>  | 50.728 | Heteroclic acid         | C <sub>32</sub> H <sub>48</sub> O <sub>5</sub> | [M+H] <sup>+</sup>      | 513.35745 | 513.35691 | -1.05 | 471.57932, 453.18756, 437.20123, 189.16437, 181.52179, 123.01650, 119.08614, 107.08605, 95.08551, 81.07011                                                                                                                                                                                          | In-house database |
| <b>C36</b>  | 51.901 | Schisanlactone B isomer | C <sub>30</sub> H <sub>42</sub> O <sub>4</sub> | [M+H] <sup>+</sup>      | 467.31558 | 467.31494 | -1.38 | 449.30505, 431.29422, 425.27612, 413.28247, 403.30542, 367.26151, 347.24570, 327.23166, 309.22220, 291.21036, 271.16812, 253.15875, 243.13928, 223.14784, 211.14748, 197.13156, 183.11630, 171.11665, 157.11688, 143.08517, 131.08546, 119.08540, 105.06972, 95.08539, 81.06983, 67.05424, 55.05419 | In-house database |
| <b>C37</b>  | 52.753 | Schisanlactone B isomer | C <sub>30</sub> H <sub>42</sub> O <sub>4</sub> | [M+H] <sup>+</sup>      | 467.31558 | 467.31564 | 0.12  | 431.29675, 327.23270, 285.17969, 274.45486, 167.17603, 233.15489, 215.14331, 185.13246, 173.13264, 159.11642, 145.10110, 131.08539, 119.08545, 105.06973, 95.08540, 81.06979, 67.05419, 55.05427                                                                                                    | In-house database |



|             |        |                                   |                                                |                    |           |           |       |                                                                                                                                                                                                                        |                   |
|-------------|--------|-----------------------------------|------------------------------------------------|--------------------|-----------|-----------|-------|------------------------------------------------------------------------------------------------------------------------------------------------------------------------------------------------------------------------|-------------------|
| <b>C38*</b> | 52.893 | Schisanlactone E                  | C <sub>32</sub> H <sub>44</sub> O <sub>4</sub> | [M+H] <sup>+</sup> | 469.33123 | 469.33110 | -0.29 | 451.32086, 433.31317, 329.24805, 285.18118, 231.17500, 215.14346, 187.14832, 173.13266, 159.11678, 145.10118, 133.10138, 119.08554, 105.06995, 95.08549, 93.06978, 79.05423, 67.05425                                  | In-house database |
| <b>C39</b>  | 53.889 | Schisanlactone E isomer           | C <sub>32</sub> H <sub>44</sub> O <sub>4</sub> | [M+H] <sup>+</sup> | 469.33123 | 469.33113 | -0.22 | 451.32144, 433.31253, 415.29794, 405.31619, 329.24683, 311.23801, 281.35046, 247.16980, 235.16972, 187.14838, 173.13261, 159.11671, 145.10129, 133.10139, 119.08567, 105.06984, 95.08555, 81.06987, 67.05429, 55.05429 | In-house database |
| <b>C40</b>  | 54.147 | Diosgenin isomer                  | C <sub>27</sub> H <sub>44</sub> O <sub>5</sub> | [M+H] <sup>+</sup> | 415.32067 | 415.32070 | 0.07  | 397.30835, 215.17924, 195.13792, 177.12723, 159.11687, 147.11667, 135.11684, 121.10114, 107.08546, 95.08651, 93.06987, 81.06990, 67.05422, 55.05429                                                                    | mzCloud           |
| <b>C41</b>  | 55.731 | 12 $\alpha$ -Acetoxycoccinic acid | C <sub>32</sub> H <sub>48</sub> O <sub>5</sub> | [M+H] <sup>+</sup> | 513.35745 | 513.35731 | -0.27 | 435.32507, 351.31882, 325.24991, 313.25211, 201.16438, 187.14780, 159.11737, 145.10149, 133.10091, 119.08548, 105.06991, 95.08561, 91.05393, 67.05424                                                                  | In-house database |
| <b>C42</b>  | 55.731 | Neokadsuranic acid A              | C <sub>30</sub> H <sub>44</sub> O <sub>3</sub> | [M+H] <sup>+</sup> | 453.33632 | 453.33630 | -0.04 | 435.32581, 247.16937, 233.15306, 201.16391, 187.14807, 173.13268, 159.11682, 133.10117, 119.08536, 105.06982, 95.08550, 93.06988, 91.05406, 81.07000, 67.05428, 55.05437                                               | In-house database |
| <b>C43</b>  | 58.010 | Schisanlactone E isomer           | C <sub>32</sub> H <sub>44</sub> O <sub>4</sub> | [M+H] <sup>+</sup> | 469.33123 | 469.33105 | -0.39 | 247.16936, 235.16965, 217.15889, 173.13242, 145.10175, 131.08540, 119.08555, 95.08553, 81.06988, 55.05423                                                                                                              | In-house database |
| <b>C44*</b> | 58.247 | Nigranoic acid                    | C <sub>30</sub> H <sub>46</sub> O <sub>4</sub> | [M+H] <sup>+</sup> | 471.34688 | 471.34672 | -0.35 | 435.32303, 365.72641, 351.45129, 295.63046, 247.17046, 235.16968, 217.15926, 187.14874, 173.13228, 161.13283, 133.10150, 121.10109, 107.08549, 95.08549, 93.06977, 81.06979, 67.05428                                  | In-house database |

|             |        |                         |                                                |                                     |           |           |       |                                                                                                                                                                                                             |                   |
|-------------|--------|-------------------------|------------------------------------------------|-------------------------------------|-----------|-----------|-------|-------------------------------------------------------------------------------------------------------------------------------------------------------------------------------------------------------------|-------------------|
| <b>C45*</b> | 61.277 | Heteroclitalactone F    | C <sub>31</sub> H <sub>46</sub> O <sub>4</sub> | [M+H] <sup>+</sup>                  | 483.34688 | 483.34690 | 0.03  | 451.32382, 433.30942, 311.23730, 293.22510, 263.20319, 213.16460, 187.14856, 161.09625, 159.11644, 145.10141, 133.101110, 131.08565, 119.08542, 105.06983, 95.08553, 93.06982, 81.06989                     | In-house database |
| <b>C46</b>  | 61.433 | Ursolic acid isomer     | C <sub>30</sub> H <sub>48</sub> O <sub>3</sub> | [M-H <sub>2</sub> O+H] <sup>+</sup> | 439.35706 | 439.35711 | 0.12  | 325.15579, 202.05374, 191.17990, 175.14894, 161.13344, 147.11685, 135.11726, 121.10152, 109.10143, 95.08568, 81.06994, 67.0544, 55.05437                                                                    | mzCloud           |
| <b>C47*</b> | 63.706 | Schisandronic acid      | C <sub>30</sub> H <sub>46</sub> O <sub>3</sub> | [M+H] <sup>+</sup>                  | 455.35197 | 455.35186 | -0.24 | 437.34320, 247.16879, 235.16888, 203.17966, 201.16307, 189.16406, 161.13226, 135.11647, 119.08535, 109.10106, 95.08546, 81.06982, 67.05418                                                                  | In-house database |
| <b>C48</b>  | 64.478 | Ursolic acid            | C <sub>30</sub> H <sub>48</sub> O <sub>3</sub> | [M+H] <sup>+</sup>                  | 457.36762 | 457.36764 | 0.04  | 437.34320, 217.19547, 203.17960, 201.16365, 161.13228, 135.11688, 133.10121, 119.08540, 105.06985, 95.08543, 81.06990, 67.05422                                                                             | mzCloud           |
| <b>C49</b>  | 64.787 | Oleanolic acid          | C <sub>30</sub> H <sub>48</sub> O <sub>3</sub> | [M+H] <sup>+</sup>                  | 457.36762 | 457.36766 | 0.09  | 439.35944, 384.11993, 247.16879, 203.17966, 189.16406, 161.13226, 147.11685, 119.08535, 109.10106, 95.08546, 81.06982, 67.05418                                                                             | mzCloud           |
| <b>C50</b>  | 66.262 | Cycloartenone           | C <sub>30</sub> H <sub>48</sub> O              | [M+H] <sup>+</sup>                  | 425.37779 | 425.37781 | 0.04  | 407.36716, 369.32123, 313.25238, 299.23941, 271.20551, 257.19089, 245.19131, 199.14749, 205.19518, 173.13274, 161.13269, 149.13242, 135.11697, 119.08544, 109.10108, 95.08548, 81.06992, 67.05428, 59.04921 | In-house          |
| <b>C51</b>  | 66.296 | Schisanlactone E isomer | C <sub>32</sub> H <sub>44</sub> O <sub>4</sub> | [M+H] <sup>+</sup>                  | 469.33123 | 469.33119 | -0.10 | 233.15594, 173.13187, 159.11713, 145.10181, 133.10092, 119.08538, 105.07013, 95.08530, 81.07006, 67.05432, 55.04543                                                                                         | In-house database |

|            |        |                                          |   |                                                |                    |           |           |       |                                                                                                                                                                                                                                    |                   |
|------------|--------|------------------------------------------|---|------------------------------------------------|--------------------|-----------|-----------|-------|------------------------------------------------------------------------------------------------------------------------------------------------------------------------------------------------------------------------------------|-------------------|
| <b>C52</b> | 69.364 | Cholecalciferol                          |   | C <sub>27</sub> H <sub>44</sub> O <sub>5</sub> | [M+H] <sup>+</sup> | 385.34649 | 385.34640 | -0.24 | 367.33630, 325.29276, 259.24451, 255.21155, 241.19572, 213.16348, 199.14818, 187.14865, 173.13260, 159.11690, 145.10147, 131.08531, 119.08538, 105.06983, 95.08555, 81.06987, 67.05420, 55.05425                                   | mzCloud           |
| <b>C53</b> | 73.577 | Coccinetane isomer                       | A | C <sub>30</sub> H <sub>48</sub> O <sub>2</sub> | [M+H] <sup>+</sup> | 441.37271 | 441.37267 | -0.08 | 441.29883, 315.15802, 231.21091, 203.17947, 149.13249, 121.10101, 107.08559, 93.06988, 81.06994, 69.07001, 67.05431                                                                                                                | In-house database |
| <b>C54</b> | 73.769 | Schisanlactone B isomer                  |   | C <sub>30</sub> H <sub>42</sub> O <sub>4</sub> | [M+H] <sup>+</sup> | 467.31558 | 467.31550 | -0.18 | 449.30820, 431.29645, 327.22803, 309.22180, 273.18457, 247.17140, 213.12794, 197.13271, 171.11676, 157.10091, 133.10083, 119.08539, 105.06982, 95.08530, 81.06980, 67.05422                                                        | In-house database |
| <b>C55</b> | 74.396 | <i>seco</i> -Neokadsuranic acid A        |   | C <sub>32</sub> H <sub>44</sub> O <sub>4</sub> | [M+H] <sup>+</sup> | 469.33123 | 469.33114 | -0.20 | 451.31946, 433.31177, 329.24820, 323.17563, 231.17366, 219.13928, 203.14259, 173.13258, 159.11707, 145.10106, 133.10123, 119.08539, 107.08550, 95.08535, 81.06978, 67.05421                                                        | In-house database |
| <b>C56</b> | 74.638 | Schisanlactone B isomer                  |   | C <sub>30</sub> H <sub>42</sub> O <sub>4</sub> | [M+H] <sup>+</sup> | 467.31558 | 467.31554 | -0.10 | 449.30487, 431.29623, 339.22504, 327.23236, 297.18668, 279.17505, 271.17145, 233.15407, 225.16556, 211.14836, 199.14915, 185.13300, 171.11629, 157.10127, 145.10104, 131.08592, 119.08540, 105.06982, 93.06972, 81.06994, 67.05424 | In-house database |
| <b>C57</b> | 76.757 | <i>seco</i> -Neokadsuranic acid A isomer |   | C <sub>32</sub> H <sub>44</sub> O <sub>4</sub> | [M+H] <sup>+</sup> | 469.33123 | 469.33088 | -0.76 | 249.18535, 213.16403, 203.14371, 185.13203, 159.11666, 145.10158, 119.08537, 95.08524, 81.07002, 67.05440                                                                                                                          | In-house database |

|            |        |                                          |                                                |                    |           |           |       |                                                                                                                                                                                                                                   |                   |
|------------|--------|------------------------------------------|------------------------------------------------|--------------------|-----------|-----------|-------|-----------------------------------------------------------------------------------------------------------------------------------------------------------------------------------------------------------------------------------|-------------------|
| <b>C58</b> | 77.103 | Schisanlactone B isomer                  | C <sub>30</sub> H <sub>42</sub> O <sub>4</sub> | [M+H] <sup>+</sup> | 467.31558 | 467.31557 | -0.03 | 431.299535, 327.23090, 275.16586, 267.17645, 247.16931, 233.15295, 215.14333, 197.13208, 159.11653, 145.10118, 131.08543, 119.08519, 105.06972, 95.08546, 81.06973, 67.05418, 55.05430                                            | In-house database |
| <b>C59</b> | 77.922 | Schisanlactone B isomer                  | C <sub>30</sub> H <sub>42</sub> O <sub>4</sub> | [M+H] <sup>+</sup> | 467.31558 | 467.31552 | -0.14 | 431.30060, 233.15482, 215.14354, 199.14844, 171.11671, 145.10120, 131.08566, 119.08562, 105.06995, 95.08537, 81.06998, 67.05435, 55.05434                                                                                         | In-house database |
| <b>C60</b> | 78.010 | <i>seco</i> -Neokadsuranic acid A isomer | C <sub>32</sub> H <sub>44</sub> O <sub>4</sub> | [M+H] <sup>+</sup> | 469.33123 | 469.33111 | -0.27 | 451.32114, 433.31052, 405.31714, 337.25513, 331.98972, 311.23560, 293.22583, 249.18648, 235.16969, 213.16386, 187.14850, 173.13231, 159.11673, 145.10136, 133.10127, 119.08542, 105.06984, 95.08550, 81.06989, 67.05422, 55.05424 | In-house database |
| <b>C61</b> | 78.481 | <i>seco</i> -Neokadsuranic acid A isomer | C <sub>32</sub> H <sub>44</sub> O <sub>4</sub> | [M+H] <sup>+</sup> | 469.33123 | 469.33112 | -0.24 | 451.32047, 433.31009, 337.25394, 329.24799, 325.21521, 249.18748, 231.17618, 215.14371, 173.13261, 159.11707, 145.10112, 133.10115, 119.08546, 105.06960, 95.08549, 81.06986, 67.05422, 55.05449                                  | In-house database |
| <b>C62</b> | 78.860 | <i>seco</i> -Neokadsuranic acid A isomer | C <sub>32</sub> H <sub>44</sub> O <sub>4</sub> | [M+H] <sup>+</sup> | 469.33123 | 469.33113 | -0.22 | 451.31909, 433.31146, 329.24728, 311.23920, 293.22955, 235.16942, 199.14838, 173.13243, 159.11688, 145.10078, 133.10126, 119.08537, 105.06982, 95.08545, 81.06989, 67.05426, 55.05421                                             | In-house database |
| <b>C63</b> | 80.841 | Cycloartenone isomer                     | C <sub>30</sub> H <sub>48</sub> O              | [M+H] <sup>+</sup> | 425.37779 | 425.37788 | 0.21  | 407.36856, 365.19547, 262.21927, 219.17513, 215.17996, 205.19525, 191.17995, 173.13237, 161.13206, 149.13264, 135.11682, 121.10114, 109.10112, 95.08556, 81.06990, 67.05425, 55.05427                                             | In-house database |

|            |        |                        |                                                |                    |           |           |       |                                                                                                                                                                                                  |                   |
|------------|--------|------------------------|------------------------------------------------|--------------------|-----------|-----------|-------|--------------------------------------------------------------------------------------------------------------------------------------------------------------------------------------------------|-------------------|
| <b>C64</b> | 82.523 | Changnanic acid        | C <sub>32</sub> H <sub>44</sub> O <sub>4</sub> | [M+H] <sup>+</sup> | 469.33123 | 469.33121 | -0.05 | 159.11749, 145.10146, 133.10095, 121.10110, 119.08571, 107.08561, 95.08545, 81.06986, 67.05430, 55.05415                                                                                         | In-house database |
| <b>C65</b> | 83.650 | Kadsuranic acid A      | C <sub>32</sub> H <sub>44</sub> O <sub>4</sub> | [M+H] <sup>+</sup> | 469.33123 | 469.33119 | -0.10 | 433.31342, 187.14520, 173.09567, 145.10164, 133.10136, 119.08549, 95.08588, 81.07011, 67.05442, 55.05437                                                                                         | In-house database |
| <b>C66</b> | 83.847 | Changnanic acid isomer | C <sub>32</sub> H <sub>44</sub> O <sub>4</sub> | [M+H] <sup>+</sup> | 469.33123 | 469.33116 | -0.16 | 433.30722, 381.12277, 235.16847, 213.16411, 187.11156, 173.13301, 159.11716, 145.10136, 133.10123, 119.08538, 105.06974, 95.08532, 81.06977, 67.05440, 55.05443                                  | In-house database |
| <b>C67</b> | 84.264 | Changnanic acid isomer | C <sub>32</sub> H <sub>44</sub> O <sub>4</sub> | [M+H] <sup>+</sup> | 469.33123 | 469.33117 | -0.14 | 433.30972, 215.14201, 203.14308, 187.14720, 159.11707, 145.10155, 133.10129, 121.10150, 119.08580, 105.06951, 95.08566, 81.06997, 67.05434, 55.05433                                             | In-house database |
| <b>C68</b> | 85.036 | Xuetongsu F            | C <sub>32</sub> H <sub>44</sub> O <sub>4</sub> | [M+H] <sup>+</sup> | 469.33123 | 469.33126 | 0.05  | 433.31827, 231.17477, 187.14911, 173.13203, 159.11852, 145.10162, 133.10100, 121.10139, 119.08587, 95.08561, 81.07014, 67.05412, 55.05414                                                        | In-house database |
| <b>C69</b> | 86.301 | Xuetongsu F isomer     | C <sub>32</sub> H <sub>44</sub> O <sub>4</sub> | [M+H] <sup>+</sup> | 469.33123 | 469.33117 | -0.14 | 451.32428, 433.31274, 415.29910, 311.23907, 273.18576, 217.15750, 187.14861, 173.13327, 159.11691, 145.10078, 133.10080, 131.08549, 119.08553, 105.06967, 95.08536, 81.06980, 67.05406, 55.05424 | In-house database |
| <b>C70</b> | 89.285 | Xuetongsu F isomer     | C <sub>32</sub> H <sub>44</sub> O <sub>4</sub> | [M+H] <sup>+</sup> | 469.33123 | 469.33115 | -0.18 | 433.31396, 226.98375, 159.11813, 145.10107, 133.10144, 119.08553, 105.06990, 95.08557, 81.06971, 67.05448, 55.05437                                                                              | In-house database |

---

\*Verified by the reference standard.
